# Supplementary material for: Spatial Ecology of the Population of Reef Manta Rays (Mobula Alfredi) In New Caledonia Using Satellite Telemetry 1 - Horizontal Behaviour
Source: Preprints.org preprint supplement (doi:10.20944/preprints202305.1879.v1), 2023-05-26
Supplement: Supplementary file 1 [file supplementary]

SUPPLEMENTARY MATERIAL

Table S1. Summary of satellite tag deployments on reef manta rays (*Mobula alfredi*) in New Caledonia.

| Manta ID                | M1         | M2       | M3         | M4       | M5       | M6      | M7        | M8        | M9       | M10      | M11      | M12         | M13      | M14      | M15      | M16      | M17      | M18      | M19      |
|-------------------------|------------|----------|------------|----------|----------|---------|-----------|-----------|----------|----------|----------|-------------|----------|----------|----------|----------|----------|----------|----------|
| Individual information: |            |          |            |          |          |         |           |           |          |          |          |             |          |          |          |          |          |          |          |
| Sex                     | Male       | Female   | Female     | Male     | Female   | Female  | Male      | Female    | Female   | Male     | Female   | Female      | Male     | Female   | Female   | Male     | Male     | Male     | Female   |
| PTT                     | 167754     | 167755   | 151348     | 151349   | 163079   | 167757  | 140916    | 196191    | 196192   | 196193   | 196194   | 162379      | 162380   | 167758   | 174667   | 182146   | 196864   | 196865   | 196866   |
| Tracking information:   |            |          |            |          |          |         |           |           |          |          |          |             |          |          |          |          |          |          |          |
| Tag Date                | 31/01/17   | 30/01/17 | 31/01/17   | 31/01/17 | 31/01/17 | 2/02/17 | 3/12/15   | 17/02/20  | 17/02/20 | 18/02/20 | 18/02/20 | 28/11/18    | 28/11/18 | 15/02/20 | 15/02/20 | 14/02/20 | 14/02/20 | 15/02/20 | 14/02/20 |
| Duration (days)         | 110        | 54       | 49         | 50       | 136      | 174     | 80        | 22        | 30       | 131      | 50       | 3           | 5        | 54       | 181      | 105      | 67       | 88       | 68       |
| Site                    | BC, Noumea |          | DC, Noumea |          |          |         | PS, Ouvea | PN, Ouvea |          |          |          |             | Touho    |          |          |          |          |          |          |
| Deployment location:    |            |          |            |          |          |         |           |           |          |          |          |             |          |          |          |          |          |          |          |
| Latitude                | -22.495    | -22.495  | -22.363    | -22.363  | -22.363  | -22.363 | -20.708   | -20.446   | -20.446  | -20.446  | -20.446  | Undisclosed |          |          |          |          |          |          |          |
| Longitude               | 166.441    | 166.441  | 166.256    | 166.256  | 166.256  | 166.256 | 166.388   | 166.453   | 166.453  | 166.453  | 166.453  |             |          |          |          |          |          |          |          |
| Decoded (%)             | 42         | 86       | 64         | 100      | 65       | 100     | 79        | 87        | 83       | 45       | 79       | 83          | 85       | 89       | 100      | 73       | 81       | 75       | 85       |

\* indicates tags that were retrieved after release. BC, Boulari Channel. DC, Dumbea Channel. NP, Northern Pleiades. SP, Southern Pleiades. PTT, Platform Transmitting Terminal.

Table S2. Kolmogorov-Smirnov (K-S) test statistics of differences in distributions of frequencies of distance from sites records of reef manta rays (*Mobula alfredi*) (*N* = 16) in New Caledonia. P-values are above the diagonals and *D* statistics are below the diagonals.

| Sites  | Noumea | Ouvea | Touho |
|--------|--------|-------|-------|
| Noumea |        | 0     | 0.004 |
| Ouvea  | 0.714  |       | 0     |
| Touho  | 0.524  | 0.714 |       |

  

| Sex    | Male  | Female |
|--------|-------|--------|
| Male   |       | 0      |
| Female | 0.667 |        |

Table S3. Chi-Square test statistics of differences number of individuals per movement patterns of reef manta rays (*N* = 16) in New Caledonia.

| Variables | Stat     | Movement Patterns |           |                       |            |
|-----------|----------|-------------------|-----------|-----------------------|------------|
|           |          | Fidelity          | Excursion | Fidelity + Relocation | Relocation |
| Sex       | <i>t</i> | 1.17              | 0.08      | 4.75                  | 1.78       |
|           | <i>P</i> | 0.28              | 0.78      | 0.03                  | 0.18       |
| Sites     | <i>t</i> | 0.36              | 0.95      | 1.5                   | 4          |
|           | <i>P</i> | 0.84              | 0.95      | 0.47                  | 0.14       |

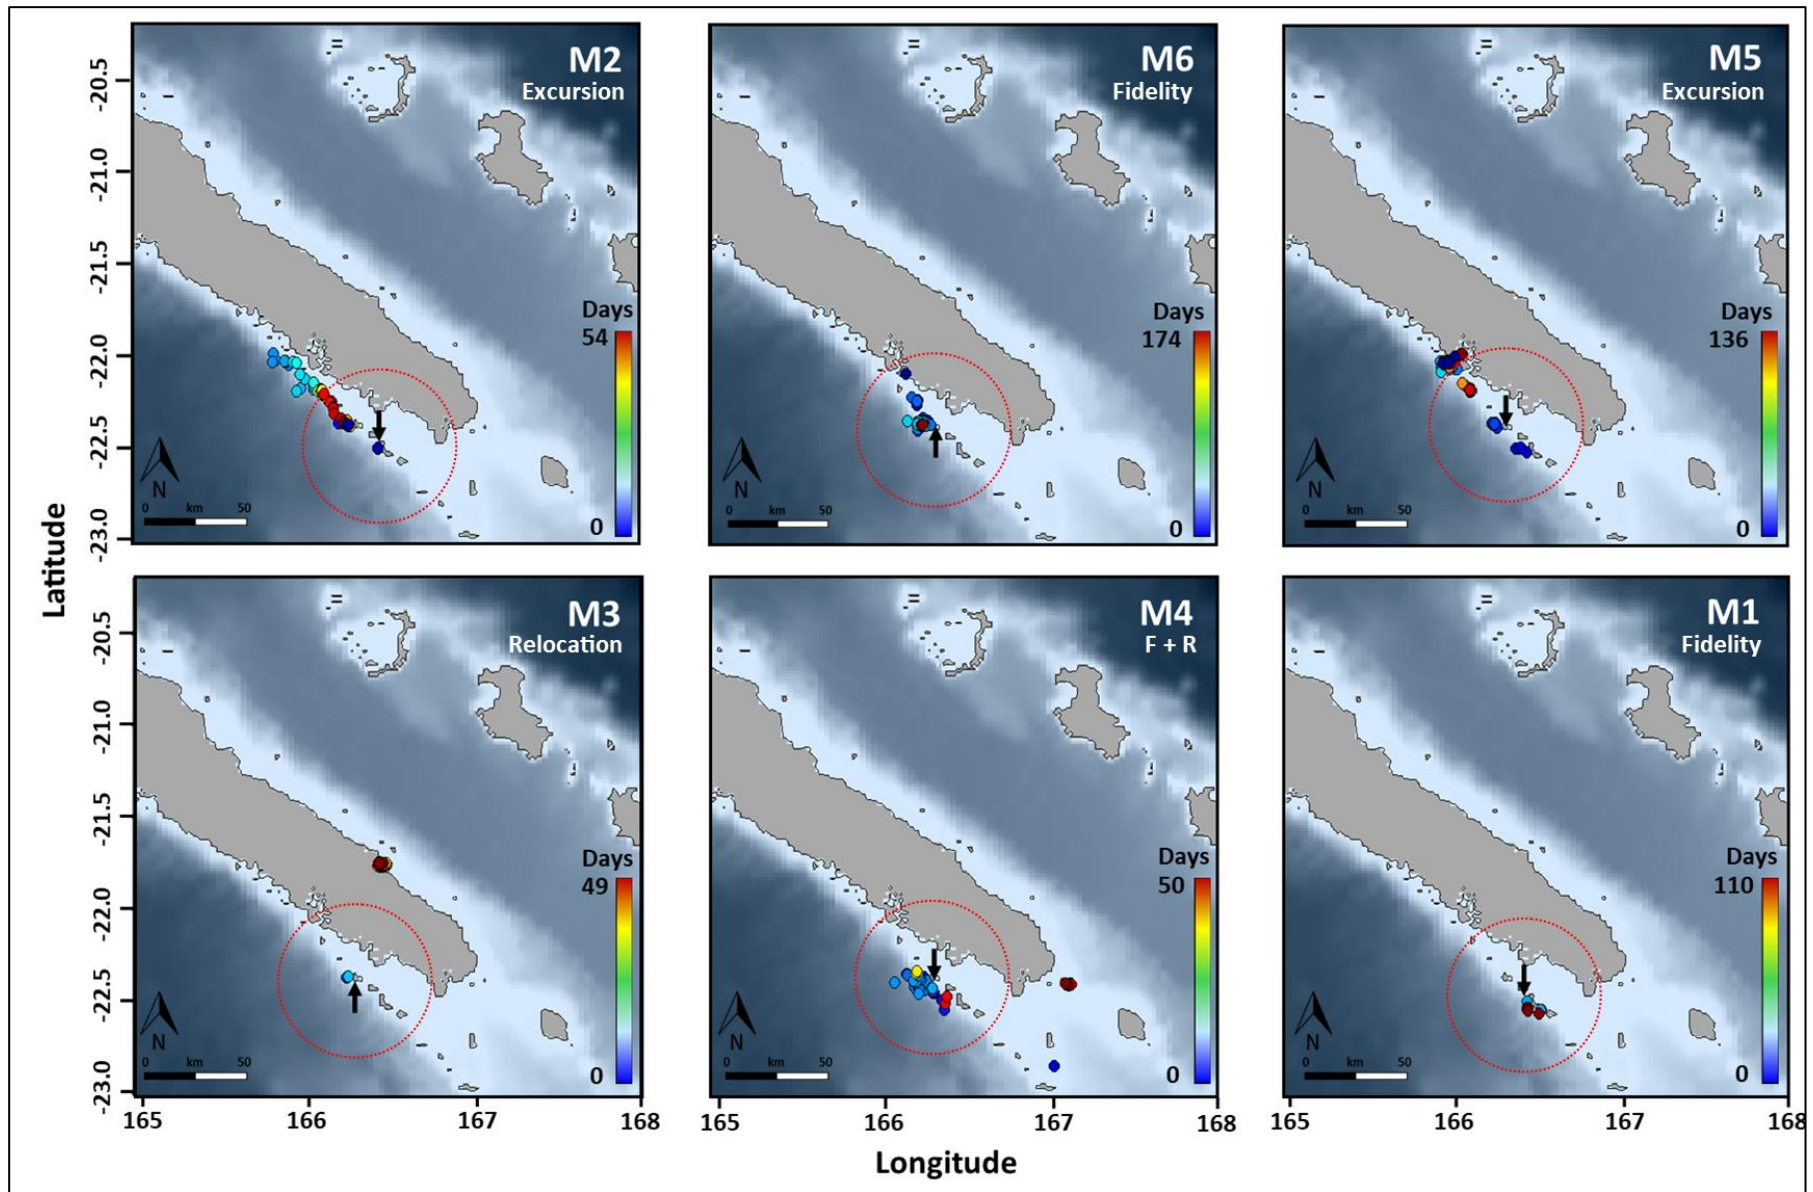

**Figure S1.** Horizontal movements of reef manta rays (*Mobula alfredi*) recorded using pop-up satellite tags (SPLASH10) in New Caledonia. Arrows indicates location of tag deployment. Red circle represents the home range area. *F + R* indicates the *Fidelity + Relocation* movement pattern.

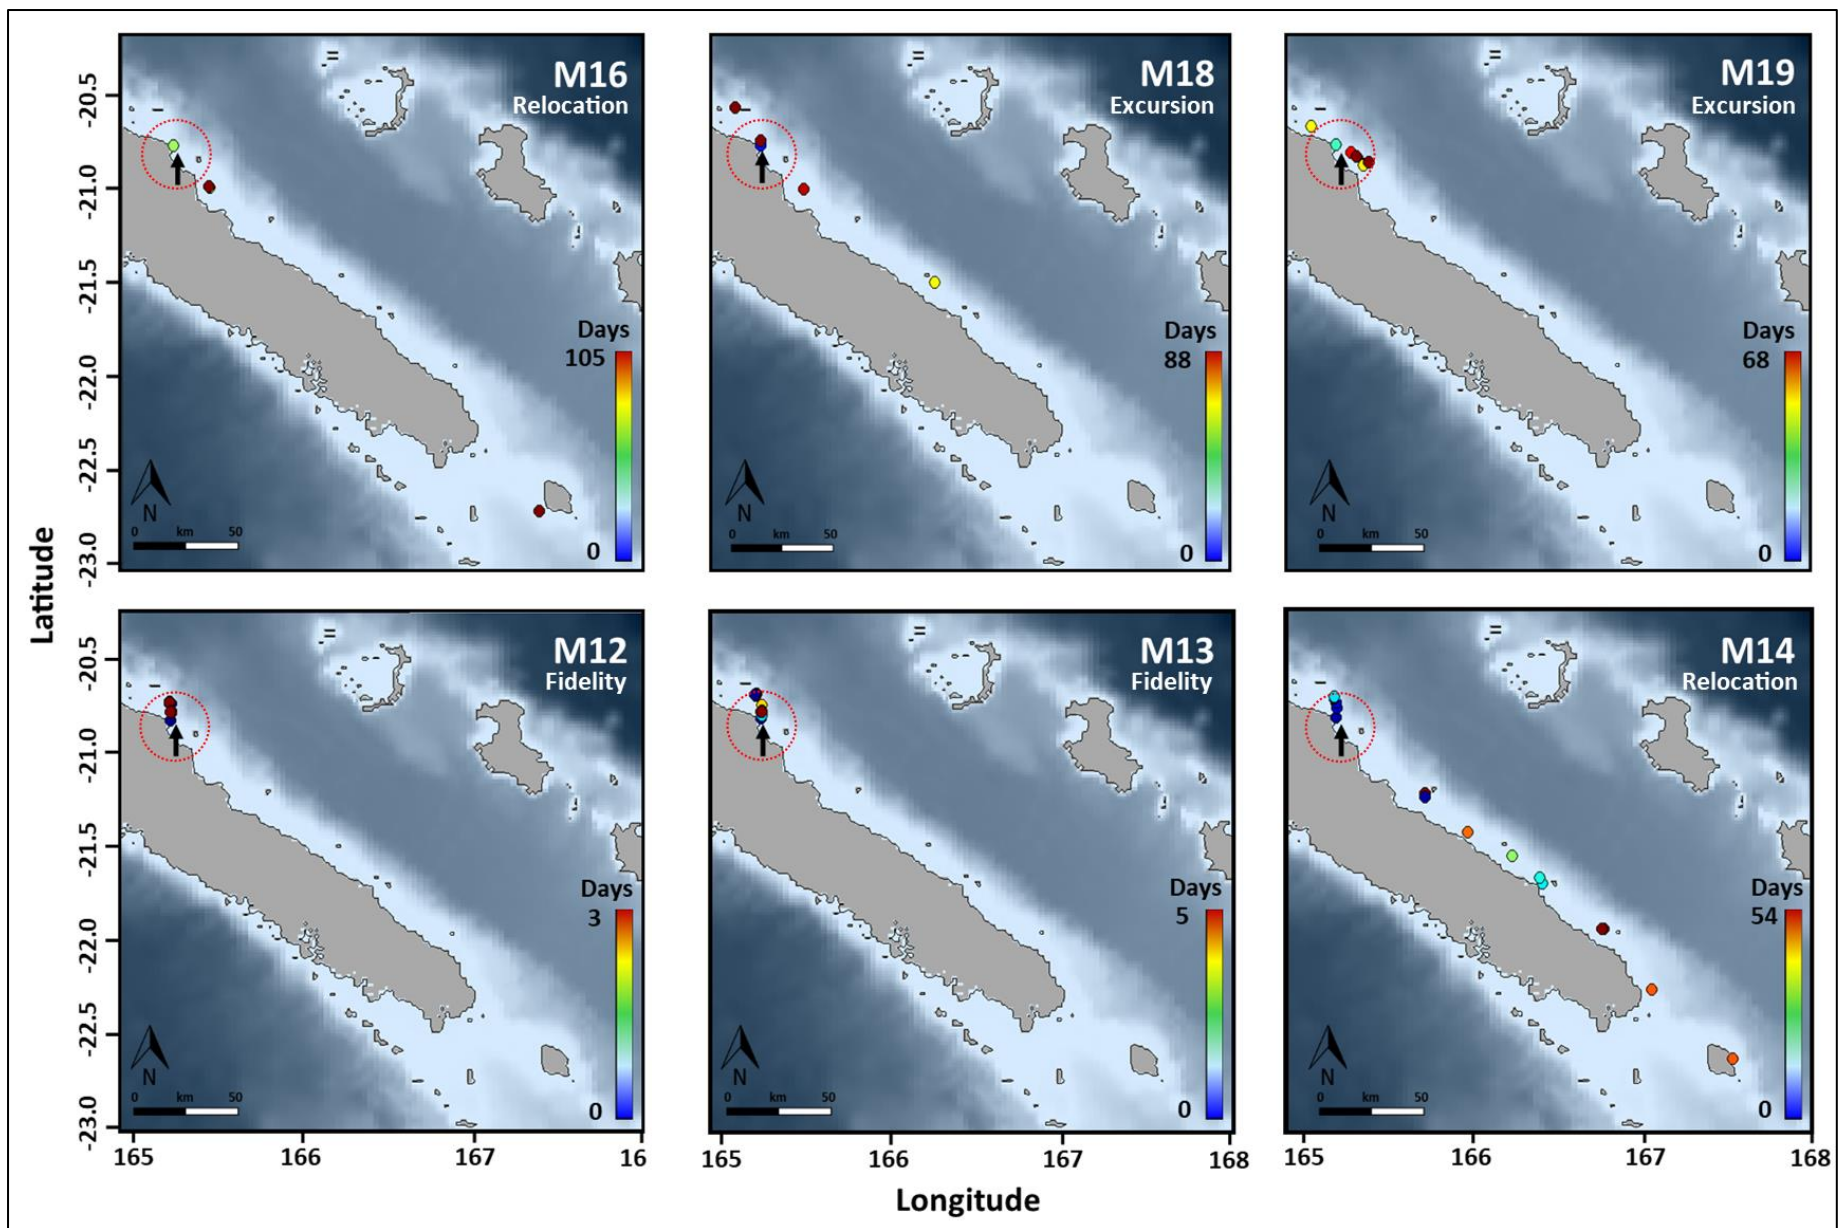

Figure S1 (continued).

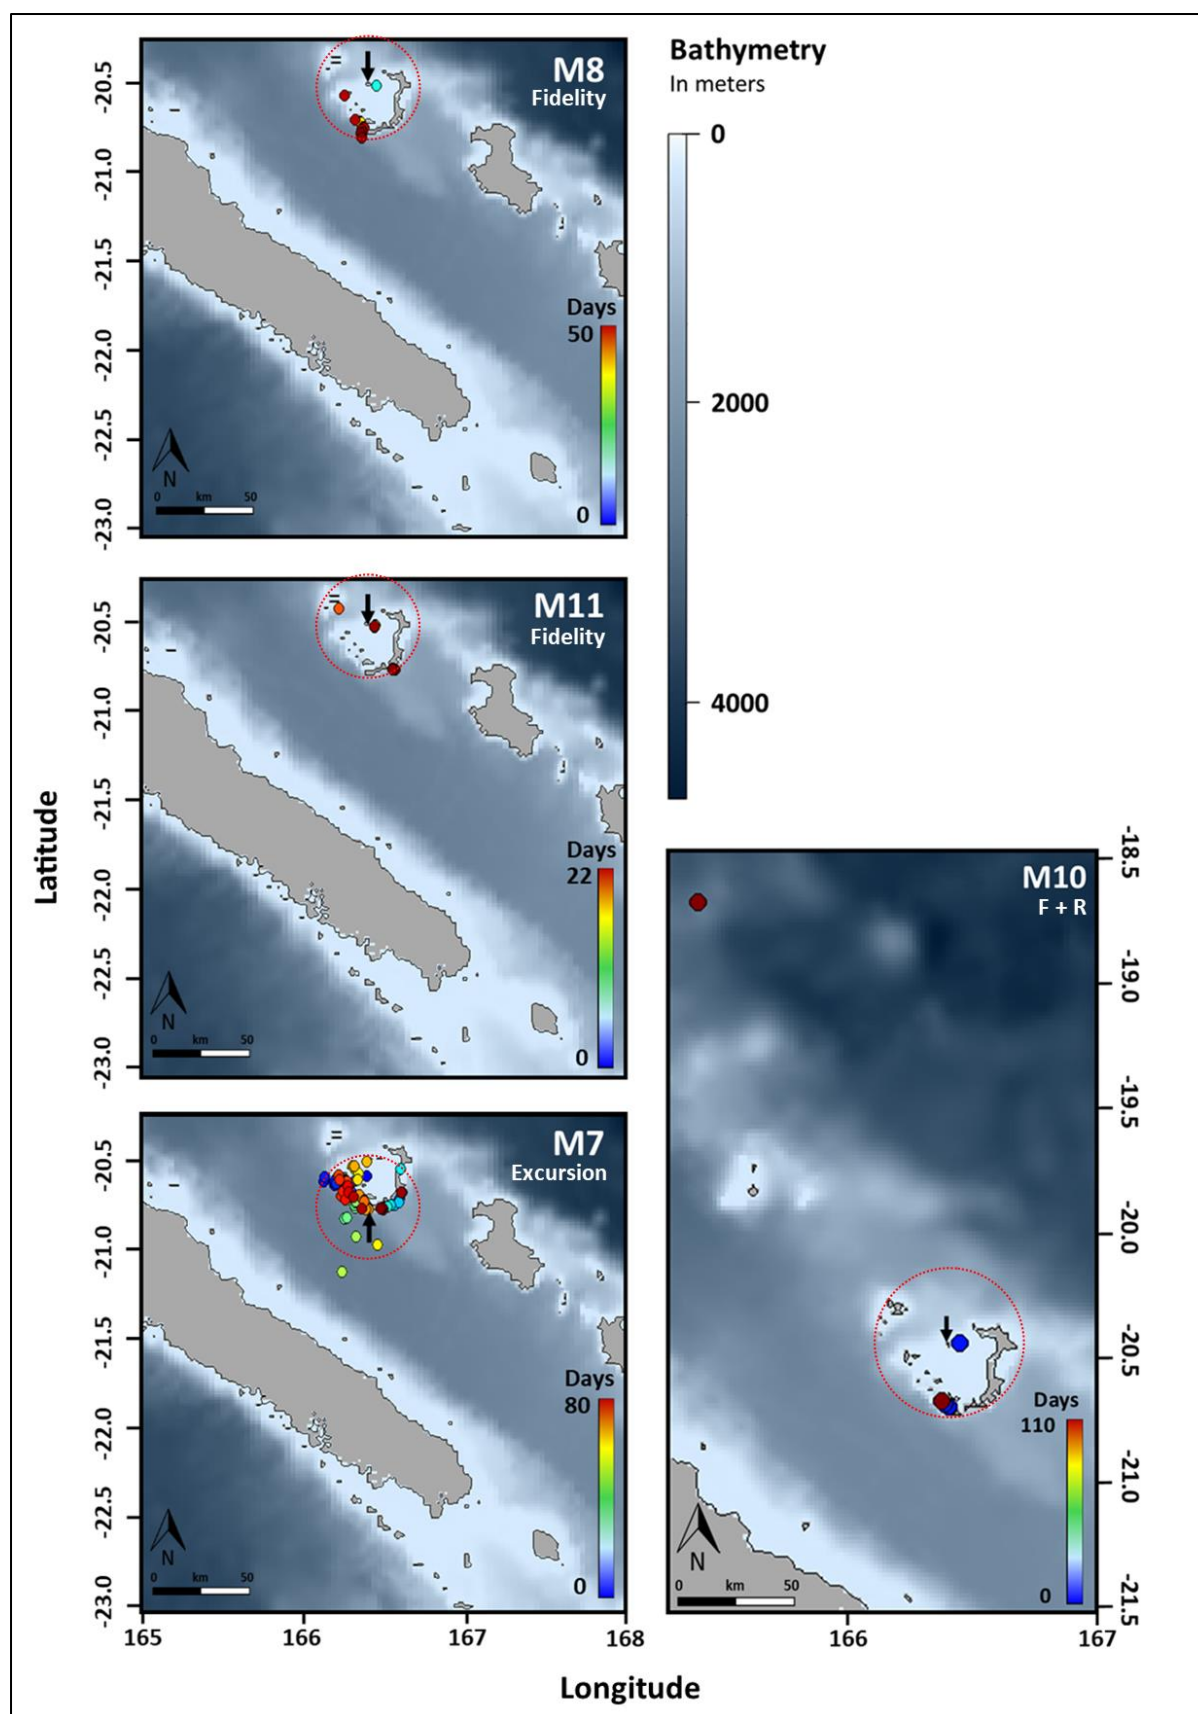

Figure S1 (continued).

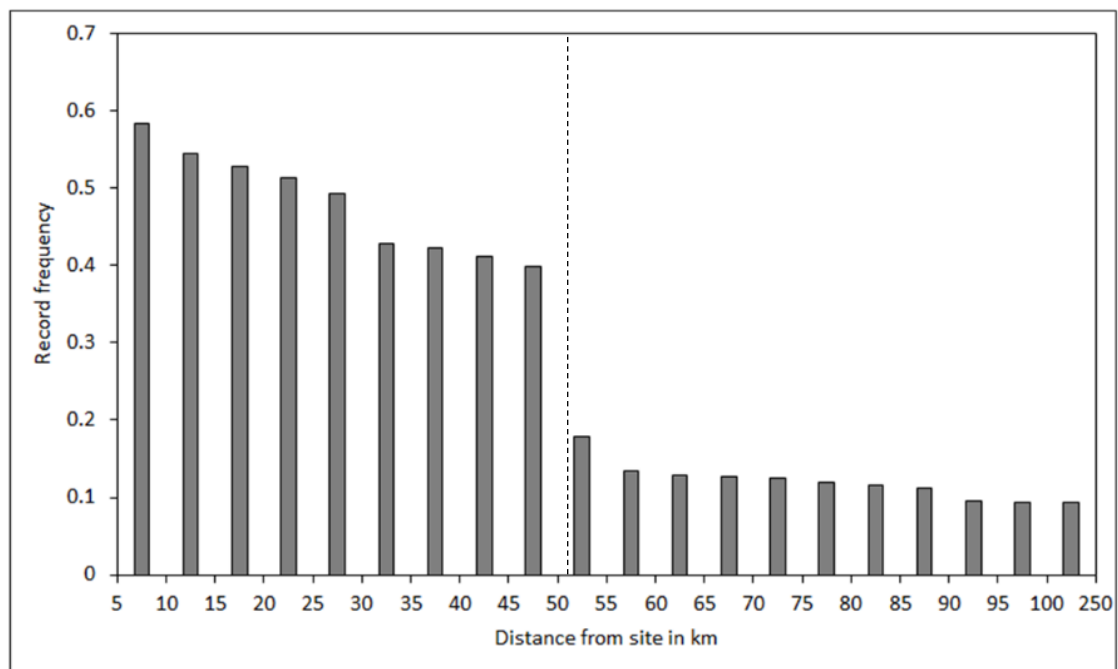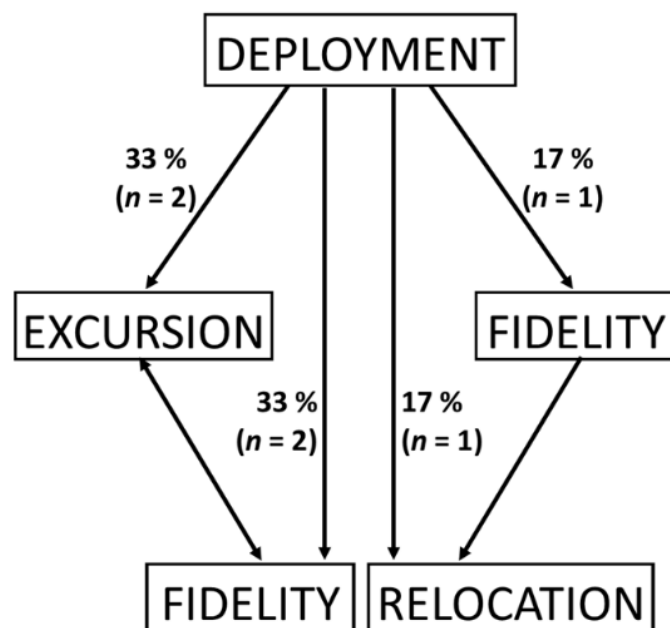

**Figure S2.** Movement patterns recorded for reef manta rays (*Mobula alfredi*) after deployment of the tag, using satellite tag (SPLASH10), in Noumea, New Caledonia. Percentage based on the total number of individuals ( $N = 6$ ). The Dashed line represent the home range limit.

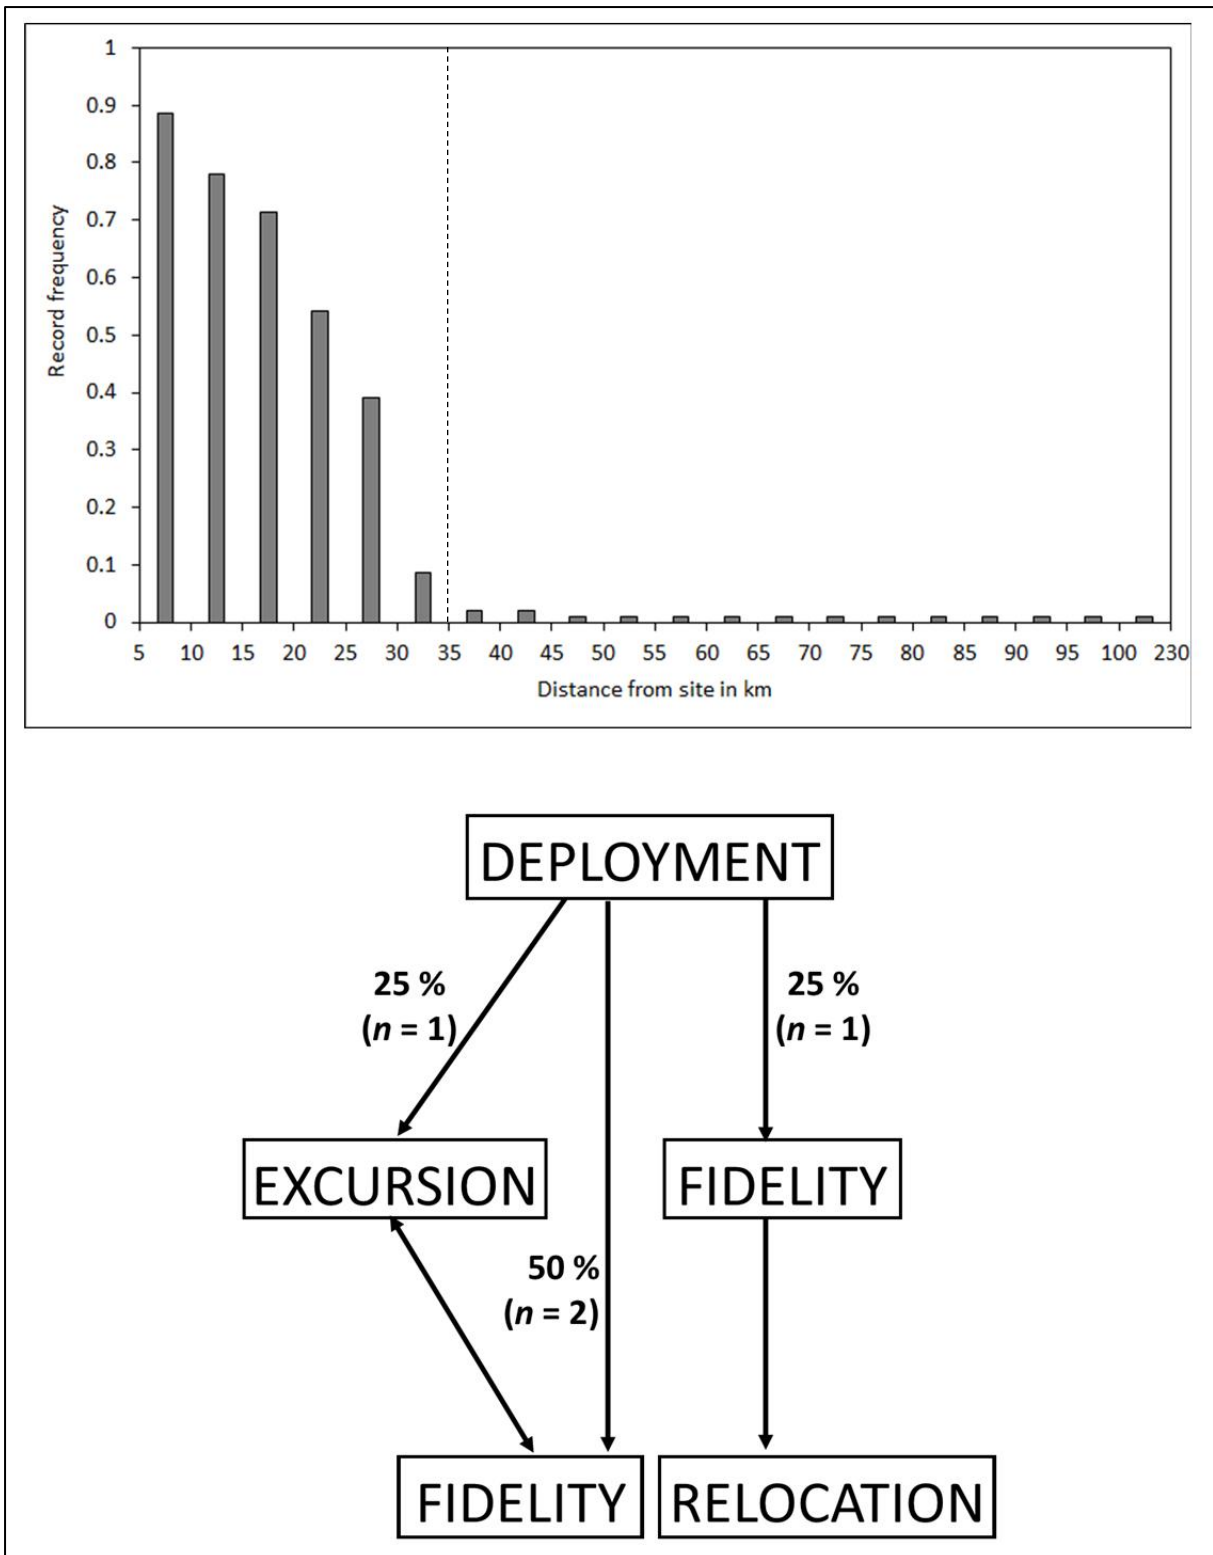

Figure S2. Continued. Ouvea ( $N = 4$ ).

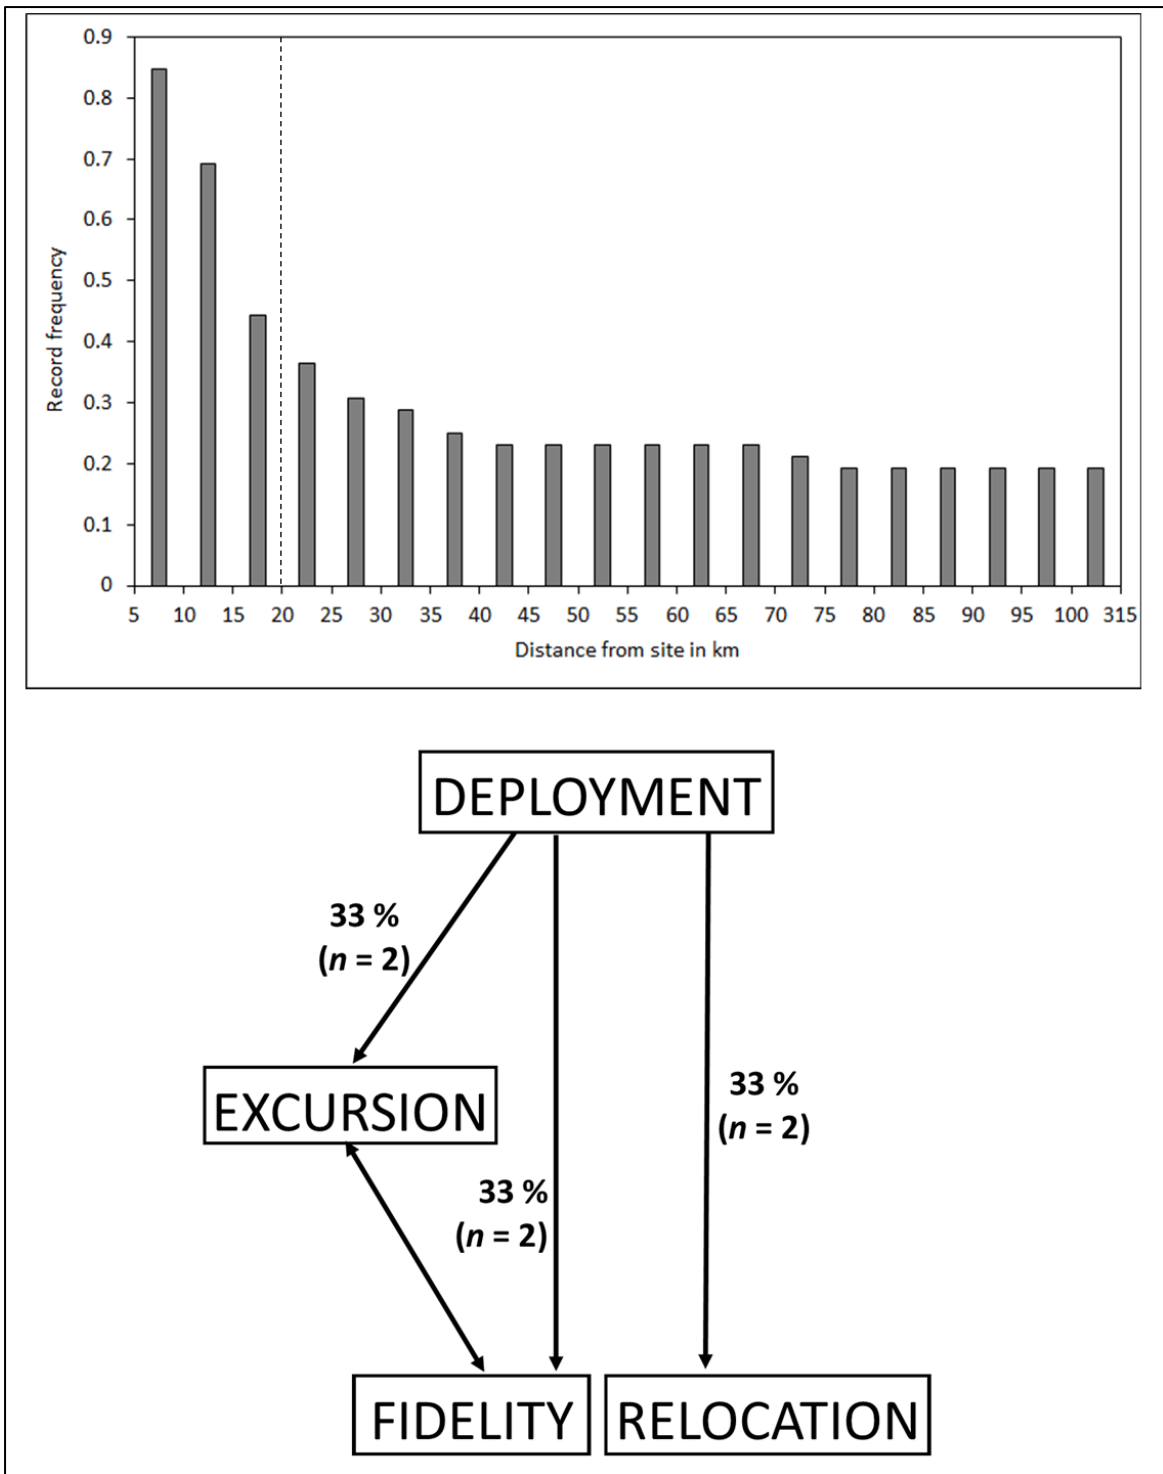

Figure S2. Continued. Touho ( $N = 6$ ).

**Table S4.** Horizontal and vertical movement metrics for reef manta rays (*Mobula alfredi*) tracked using satellite tags in New Caledonia. Patterns are F : Fidelity, E : Excursion, F + R : Fidelity + Relocation and R : Relocation

| Manta ID                       | M1     | M2     | M3     | M4     | M5     | M6     | M7     | M8     | M9     | M10    | M11    | M12    | M13    | M14    | M15                 | M16    | M17    | M18    | M19    |
|--------------------------------|--------|--------|--------|--------|--------|--------|--------|--------|--------|--------|--------|--------|--------|--------|---------------------|--------|--------|--------|--------|
| <i>Individual information:</i> |        |        |        |        |        |        |        |        |        |        |        |        |        |        |                     |        |        |        |        |
| Site                           | Noumea | Noumea | Noumea | Noumea | Noumea | Noumea | Ouvea  | Ouvea  | Ouvea  | Ouvea  | Ouvea  | Touho  | Touho  | Touho  | Touho               | Touho  | Touho  | Touho  | Touho  |
| Sex                            | Male   | Female | Female              | Male   | Male   | Male   | Female |
| PTT                            | 167754 | 167755 | 151348 | 151349 | 163079 | 167757 | 140916 | 196191 | 196192 | 196193 | 196194 | 162379 | 162380 | 167758 | 174667 <sup>M</sup> | 182146 | 196864 | 196865 | 196866 |
| <i>Horizontal movements:</i>   |        |        |        |        |        |        |        |        |        |        |        |        |        |        |                     |        |        |        |        |
| Pattern                        | F      | E      | R      | F + R  | E      | F      | E      | F      |        | F + R  | F      | F      | F      | R      |                     | R      |        | E      | E      |
| Mean distance per day (km)     | 2.3    | 3.9    | 0.2    | 7.4    | 3.9    | 7.2    | 8.4    | 3.9    | -      | 1.9    | 1.8    | 12.3   | 6.6    | 6.8    | -                   | 3      | -      | 3.6    | 1.3    |
| Total track length (km)        | 23.4   | 393.6  | 344.6  | 336    | 529.6  | 405.4  | 662    | 81.4   | -      | 277.7  | 87.3   | 24.6   | 26.3   | 687.5  | -                   | 305.3  | -      | 314.6  | 89.1   |
| Latitudinal range (km)         | 34.1   | 215.9  | 7.1    | 57.5   | 58.9   | 71.2   | 68.7   | 32.8   | -      | 224    | 37.4   | 11.7   | 15     | 56.8   | -                   | 212.4  | -      | 101.3  | 22.7   |
| Max. dist. from site (km)      | 10.1   | 86.1   | 249.7  | 96.3   | 51.8   | 33.2   | 43.7   | 34.4   | -      | 225.1  | 30.2   | 11.8   | 15.3   | 311.4  | -                   | 304.5  | -      | 131.5  | 22     |
| Max. dist. from reef (km)      | 4.3    | 12.4   | 5.3    | 17     | 6.9    | 7.4    | 35     | 5.6    | -      | 104.6  | 2.1    | 7      | 6.3    | 7      | -                   | 1.9    | -      | 5.1    | 4.5    |

<sup>M</sup> for MiniPAT tag, others are SPLASH10 tags. PTT, Platform Transmitting Terminal.

**Table S5.** Z-test statistics of differences in proportion of dive below 300 m between movement patterns recorded for reef manta rays (*Mobula alfredi*) ( $N = 16$ ) in New Caledonia. *P-values* are above the diagonals and *Z* statistics are below the diagonals.

| <b>Movement Patterns</b>     | <i>Relocation</i> | <i>Excursion</i> | <i>Fidelity</i> | <i>Fidelity + Relocation</i> |
|------------------------------|-------------------|------------------|-----------------|------------------------------|
| <i>Relocation</i>            |                   | 0.18             | 0               | 0                            |
| <i>Excursion</i>             | 1.3               |                  | 0               | 0                            |
| <i>Fidelity</i>              | 6.6               | 8.7              |                 | 0.09                         |
| <i>Fidelity + Relocation</i> | 3.3               | 4.5              | 1.7             |                              |

0 value indicates  $p < .0001$ .

**Table S6.** Kolmogorov-Smirnov (K-S) test statistics of differences in distributions of time spent at different depth ranges between movement patterns recorded for reef manta rays (*Mobula alfredi*) ( $N = 16$ ) in New Caledonia. *P-values* are above the diagonals and *D* statistics are below the diagonals.

| <b>Movement Patterns</b>     | <i>Relocation</i> | <i>Excursion</i> | <i>Fidelity</i> | <i>Fidelity + Relocation</i> |
|------------------------------|-------------------|------------------|-----------------|------------------------------|
| <i>Relocation</i>            |                   | 0.6974           | 0.9996          | 0.6974                       |
| <i>Excursion</i>             | 0.4               |                  | 0.6974          | 0.6974                       |
| <i>Fidelity</i>              | 0.2               | 0.4              |                 | 0.6974                       |
| <i>Fidelity + Relocation</i> | 0.4               | 0.4              | 0.4             |                              |
